# Supplementary material for: Microbiomes of clownfish and their symbiotic host anemone converge before their first physical contact
Source: PubMed Central journal article supplement (PMC8130386; doi:10.1186/s40168-021-01058-1), 2021-05-17

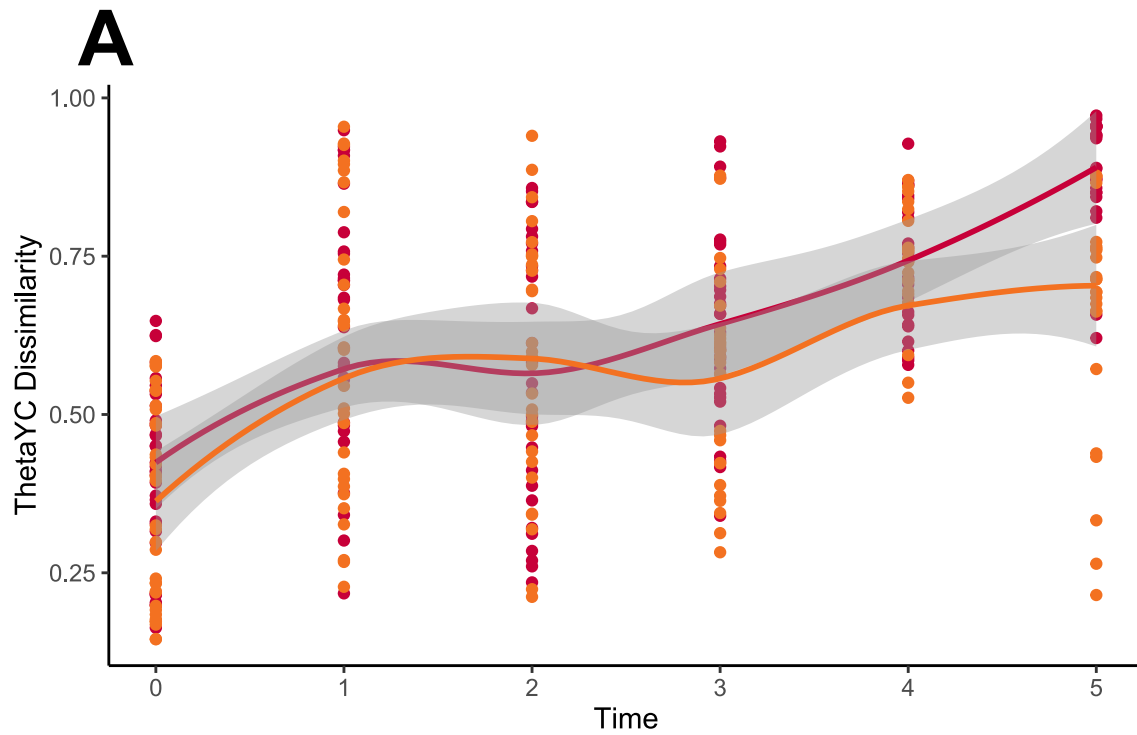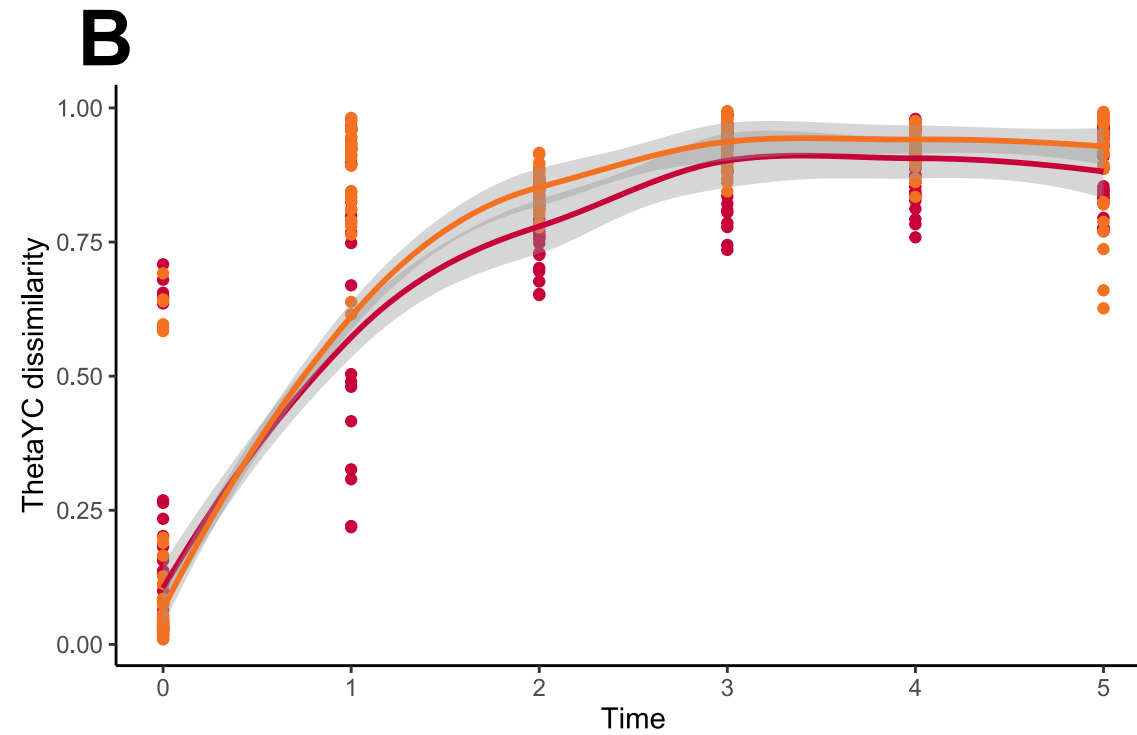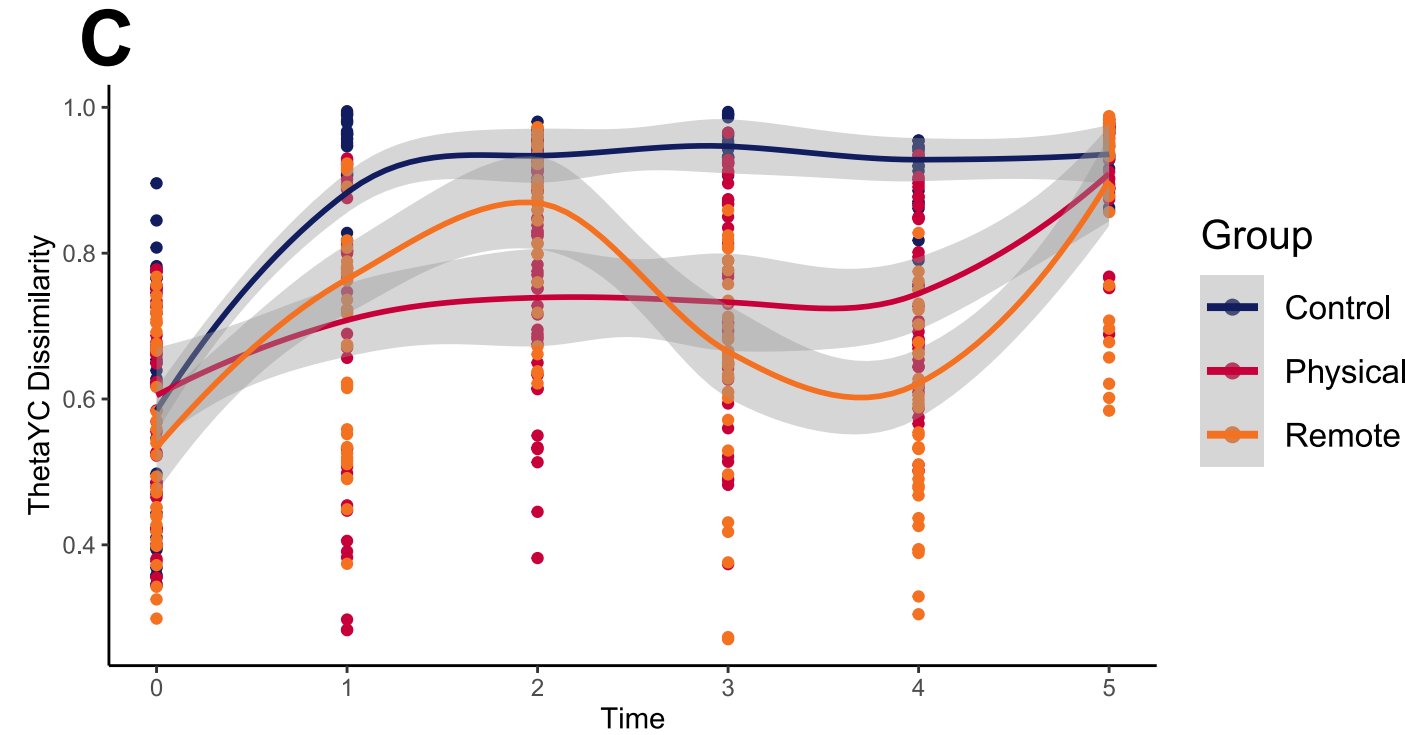

Supplement: 40168_2021_1058_MOESM7_ESM.pdf [file 40168_2021_1058_MOESM7_ESM.pdf]
